# Supplementary material
Source: Research Square preprint supplement (doi:10.21203/rs.3.rs-9298244/v1)
Supplement: Supplementary file 1 [file 2a2775a881a5cfad8345b6e0.docx]

**
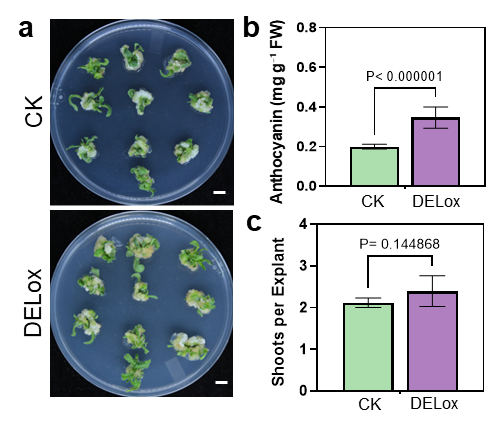
**

**Supplementary Fig. 1 Plant regeneration is retained in stable transgenic tomato lines overexpressing *DELILA*. a**, Representative regeneration phenotypes of control (CK) and DELILA overexpression (DELox) tomato lines during in vitro culture. Scale bars, 1 cm. **b**, Anthocyanin content (mg g⁻¹ FW) in CK and DELox tissues at week 3 (n = 4 biological replicates; three technical replicates per biological replicate). **c**, Shoots per explant in CK and DELox lines at week 3. Data are presented as mean ± s.d. (n = 5 biological replicates; 20 explants per replicate). Statistical significance was assessed using two-tailed Student’s *t*-tests; *P*-values are indicated.


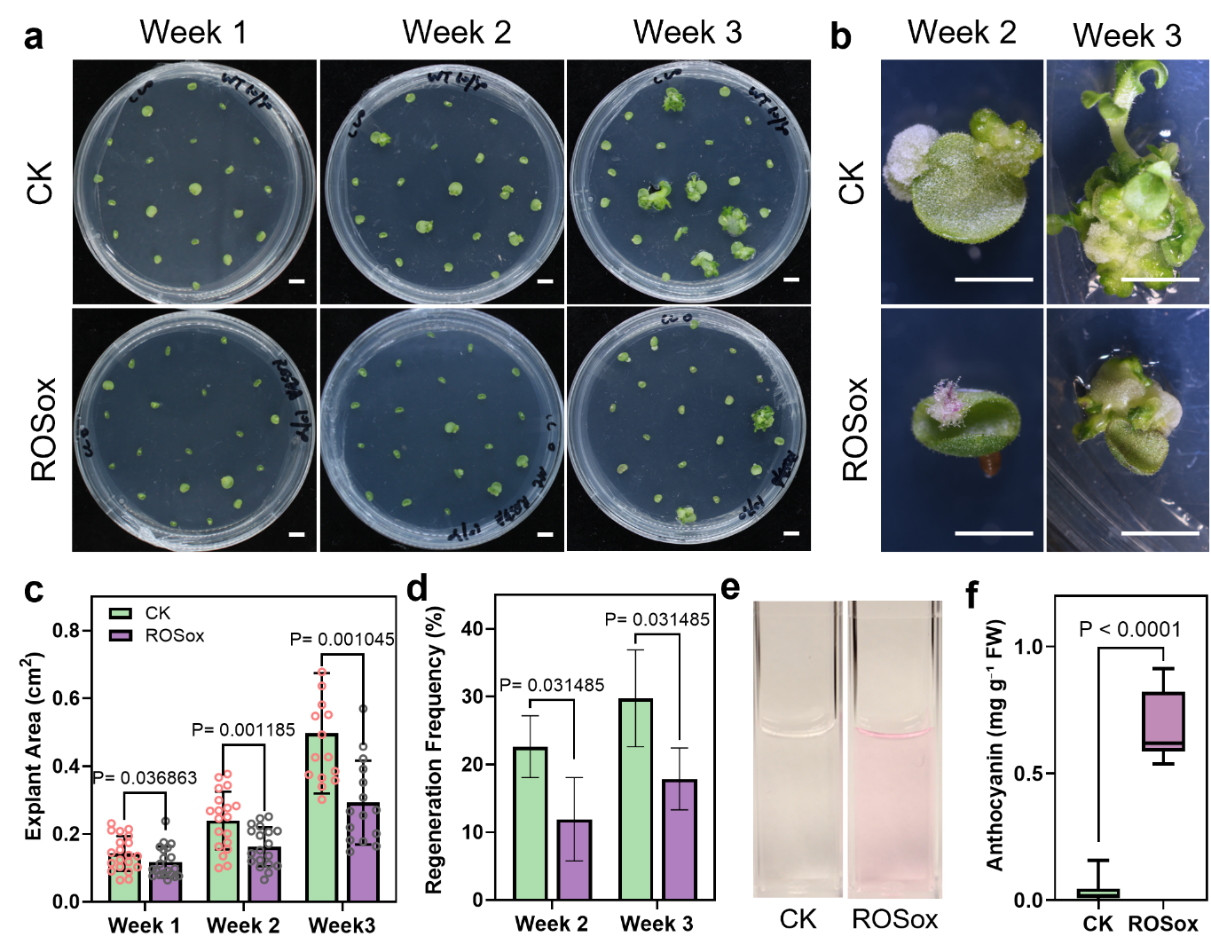


**Supplementary Fig. 2 Repeated trials show consistent reduction in regeneration in stable transgenic petunia lines overexpressing *ROSEA1*. a,** Time-course of regeneration from week 1 to week 3 in petunia explants for control (CK, top) and *ROSEA1* overexpression (ROSox-2 in Fig. 5, bottom) lines, showing reduced plantlet formation in ROSox. **b**, Representative close-up views of regenerating tissues at week 2 and week 3 for CK and ROSox. **c**, Explant area quantified from week 1 to week 3 (CK, green; ROSox-2, purple). Data are presented as mean ± s.d. (n = 20 biological replicates). **d**, Regeneration frequency (%) at week 2 and week 3 in CK and ROSox-2 lines (n = 4 biological replicates; 20 explants per replicate). **e**, Representative anthocyanin extracts from CK and ROSox tissues collected at week 3. **f**, Anthocyanin content (mg g⁻¹ FW) at week 3 in CK and ROSox tissues (n = 4 biological replicates; three technical replicates per biological replicate). Statistical significance was assessed using two-tailed Student’s *t*-tests; *P*-values are indicated. Scale bars, 1 cm (a) and 5 mm (b).

**
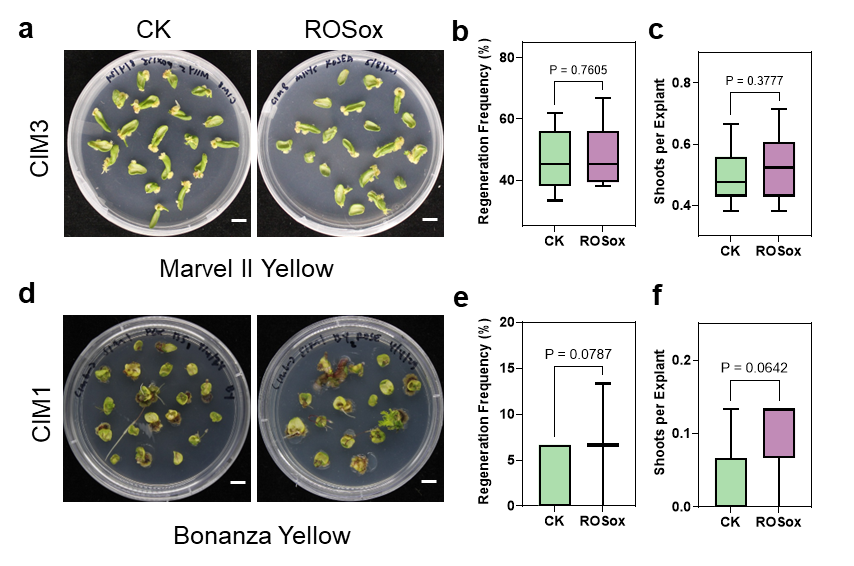
**

**Supplementary Fig. 3 The *ROSEA1*-associated regeneration penalty is not detectable in marigold under high-cytokinin conditions or in the low-regenerating genotype ‘Bonanza Yellow’. a,** Representative Petri dishes of ‘Marvel II Yellow’ explants under control (CK, left) and *ROSEA1* (ROSox, right) treatments. **b**,**c**, Regeneration frequency (%) (b) and shoots per explant (c) for ‘Marvel II Yellow’ (CK, green; ROSox, purple). **d**, Representative Petri dishes of ‘Bonanza Yellow’ explants under CK (left) and ROSox (right) treatments on CIM1. **e**,**f**, Regeneration frequency (%) (e) and shoots per explant (f) for ‘Bonanza Yellow’ (CK, green; ROSox, purple). Data are presented as mean ± s.d. (n = 4 biological replicates; 15 explants per replicate). Statistical significance was assessed using two-tailed Student’s *t*-tests; *P*-values are indicated. Scale bars, 1 cm (a,d).

**Supplementary Table 1 List of primers for qRT-PCR analysis**

| Gene name | Forward primer sequence （5'→3'） | Reverse primer sequence（5'→3'） | Note |
| --- | --- | --- | --- |
| *SlACTIN2* | TTGCTGACCGTATGAGCAAG | GGACAATGGATGGACCAGAC | qRT-PCR  in tomato |
| *ROSEA1* | ACGTTACTTGGCCGAGAGAA | AACTTCATCTTGTGGCGACG |
| *SlCHI* | TGCAACAATGGAAGGGCAAA | CGACTTCTGCTAAGCGATCG |
| *SlF3H* | CGGTTTGACATGTCTGGTGG | CGCCAGTCTTGAACCACTTC |
| *SlF3'5'H* | GGTTCAATGCCACATGTTGC | GCAACAACCATCCCACATGT |
| *SlDFR* | GCTGGAGCGATTTGGACTTC | CAGCCTTCTCTGCCAGTATCTT |
| *SlPLT5* | GTGGCTTGGCTTCTCACTTT | GCTTGGAAGAGGGAAAGTTGT |
| *SlWUS* | TGTGCAGGCAAAGTAGTAGC | TGTTCAGCAGTTGGAGACCT |
| *SlLBD16* | TGTTACACGTTCCTGTCCCC | AACTTTGTGCCAGCTGAGTC |
